# Supplementary material
Source: PubMed Central journal article supplement (PMC4527489)
Supplement: supp_ddv209_ddv209supp.pdf [file supp_ddv209_ddv209supp.pdf]

SUPPLEMENTAL MATERIALS

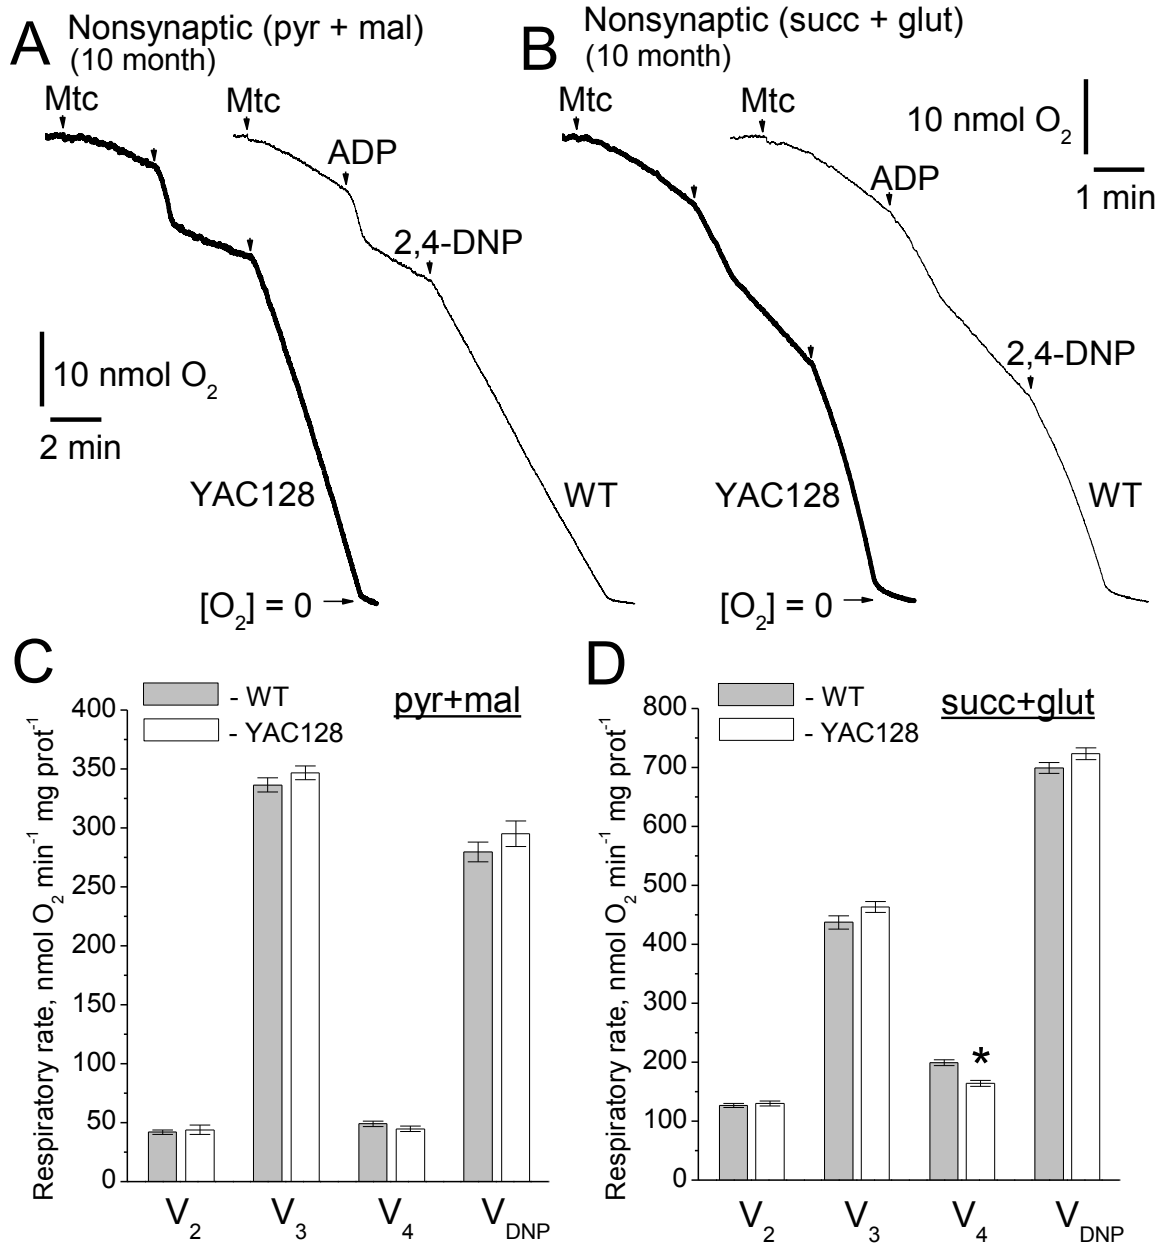

**Suppl. Figure 1. Respiratory activity of nonsynaptic mitochondria isolated from 10-month old WT (thin traces) and YAC128 (thick traces) mice.** In **A** and **B**, representative traces for mitochondrial O<sub>2</sub> consumption. Where indicated, mitochondria (Mtc), 200μM ADP, and 60μM 2,4-dinitrophenol (2,4-DNP) were added. In **A**, incubation medium was supplemented with 3 mM pyruvate (pyr) and 1 mM malate (mal). In **B**, incubation medium contained 3 mM succinate (succ) and 3 mM glutamate (glut). In **C** and **D**, statistical analysis of respiratory rates. Data are mean±SEM \**p*<0.05 comparing V<sub>4</sub> respiratory rates of mitochondria from WT and YAC128 mice, N=7.

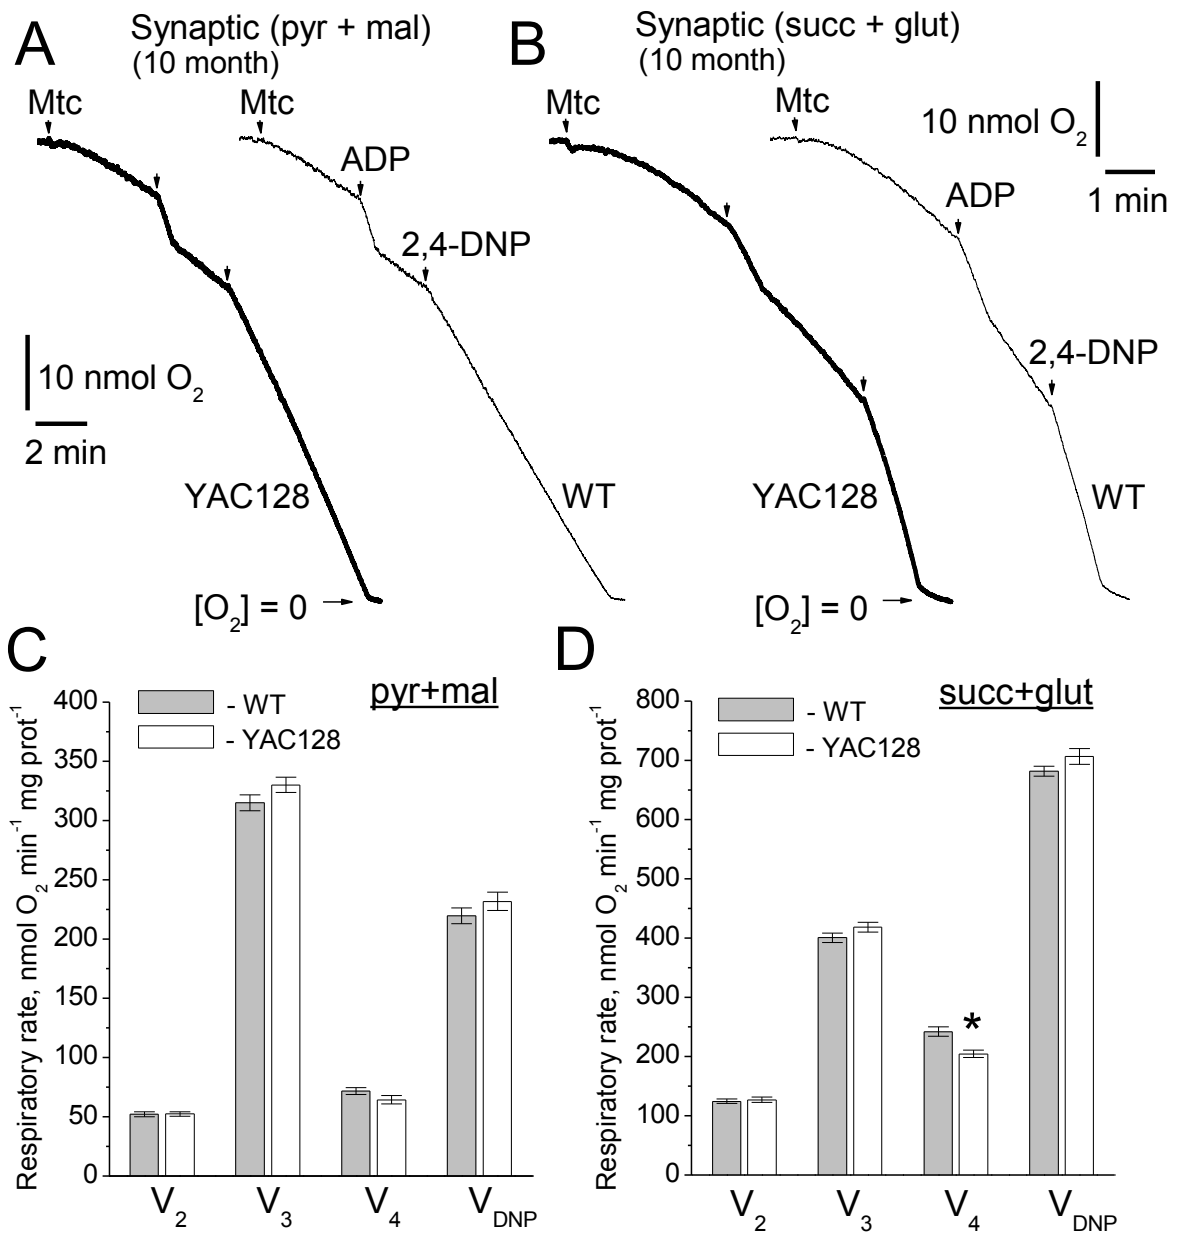

**Suppl. Figure 2. Respiratory activity of synaptic mitochondria isolated from 10-month old WT (thin traces) and YAC128 (thick traces) mice.** In **A** and **B**, representative traces for mitochondrial O<sub>2</sub> consumption. Where indicated, mitochondria (Mtc), 200μM ADP, and 60μM 2,4-dinitrophenol (2,4-DNP) were added. In **A**, incubation medium was supplemented with 3 mM pyruvate (pyr) and 1 mM malate (mal). In **B**, incubation medium contained 3 mM succinate (succ) and 3 mM glutamate (glut). In **C** and **D**, statistical analysis of respiratory rates. Data are mean±SEM. \**p*<0.05 comparing V<sub>4</sub> respiratory rates of mitochondria from WT and YAC128 mice, N=7.

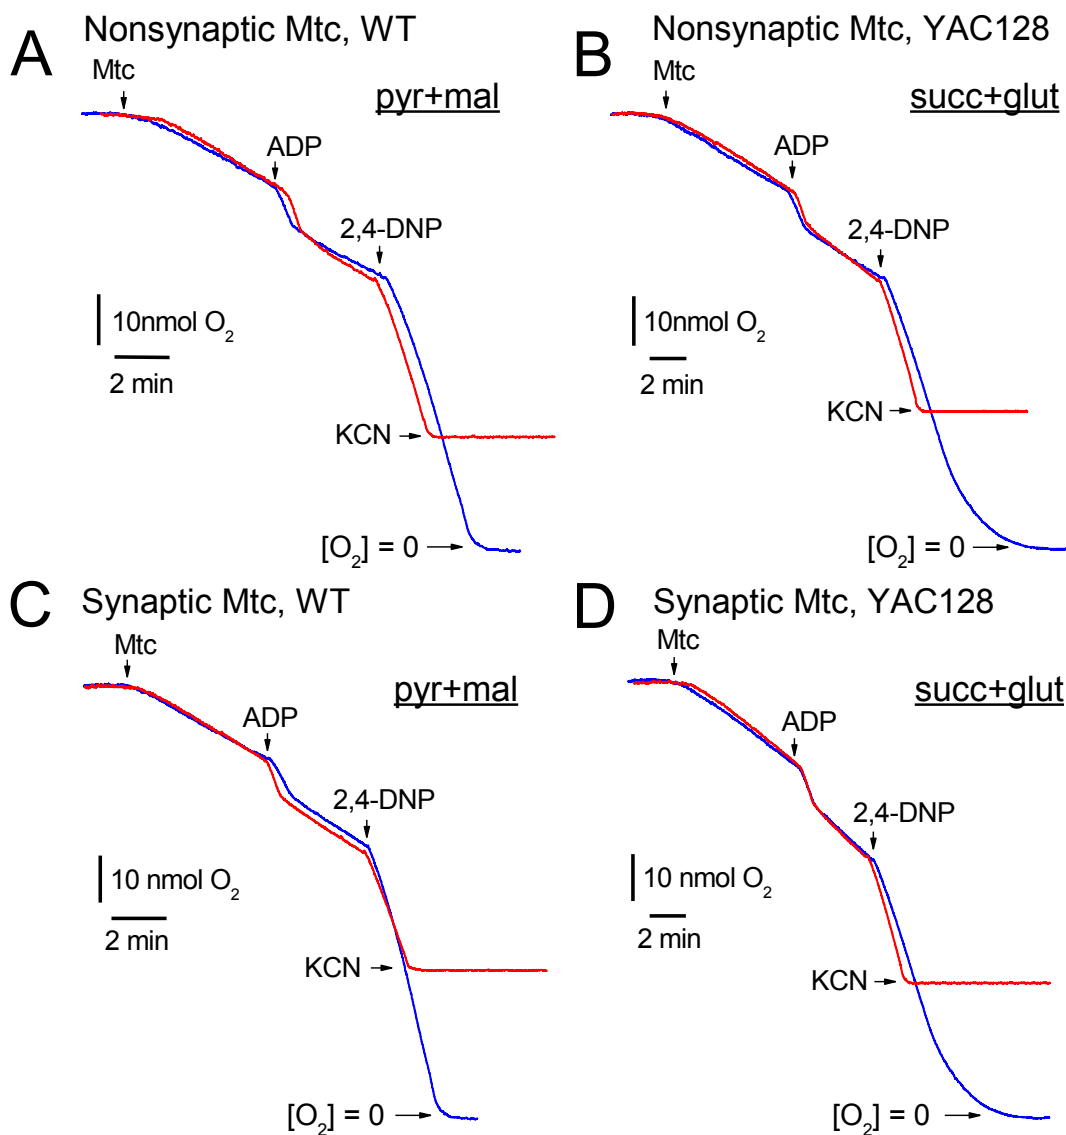

Suppl Fig 3.

**Suppl. Figure 3. KCN completely inhibits respiration of isolated brain mitochondria.** In **A** and **B**, representative traces for mitochondrial O<sub>2</sub> consumption by nonsynaptic mitochondria from WT and YAC128 mice. In **C** and **D**, representative traces for mitochondrial O<sub>2</sub> consumption by synaptic mitochondria from WT and YAC128 mice. Where indicated, mitochondria (Mtc), 200μM ADP, 60μM 2,4-dinitrophenol (2,4-DNP), and 5 mM KCN were added. In **A** and **C**, incubation medium was supplemented with 3 mM pyruvate (pyr) and 1 mM malate (mal). In **B** and **D**, incubation medium was supplemented with 3 mM succinate (succ) and 3 mM glutamate (glut).

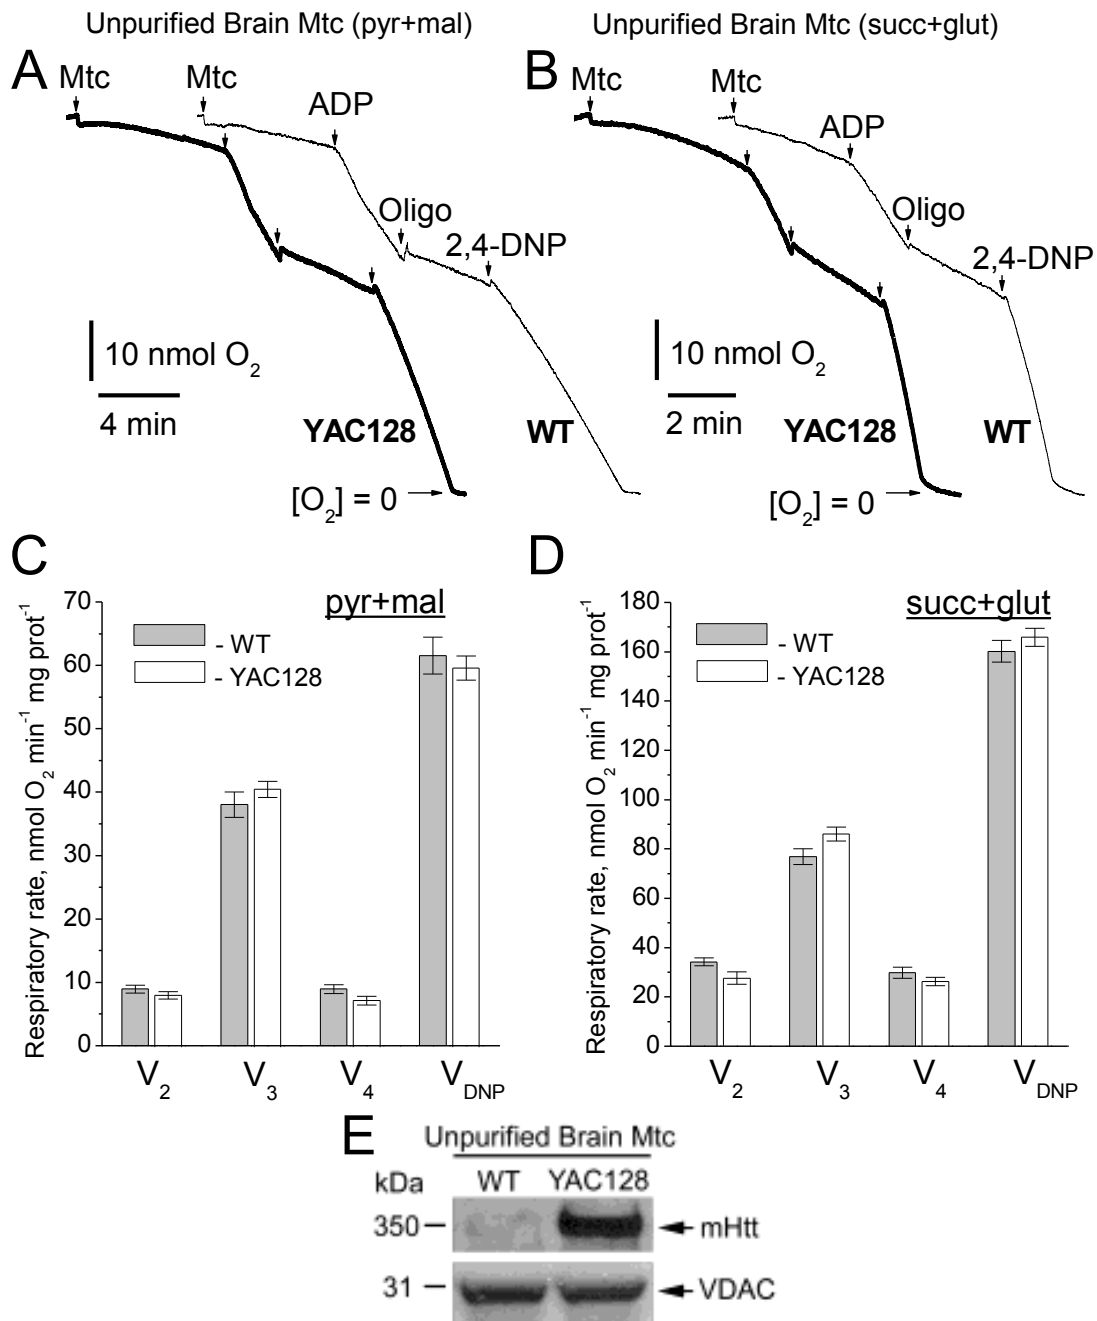

**Suppl. Figure 4. Respiratory activity of unpurified brain mitochondria isolated from 2-month old WT (thin traces) and YAC128 (thick traces) mice.** In **A** and **B**, representative traces for mitochondrial  $O_2$  consumption. Where indicated, mitochondria (Mtc), 200 $\mu$ M ADP, 1 $\mu$ M oligomycin (to inhibit ATP synthase) and 60 $\mu$ M 2,4-dinitrophenol (2,4-DNP) were added. In **A**, incubation medium was supplemented with 3 mM pyruvate (pyr) and 1 mM malate (mal). In **B**, incubation medium contained 3 mM succinate (succ) and 3 mM glutamate (glut). In **C** and **D**, statistical analysis of respiratory rates. Data are mean $\pm$ SEM, N=7. **E**, Western blot, showing the presence of mHtt in unpurified brain mitochondria from YAC128 mice. VDAC was used as a loading control.

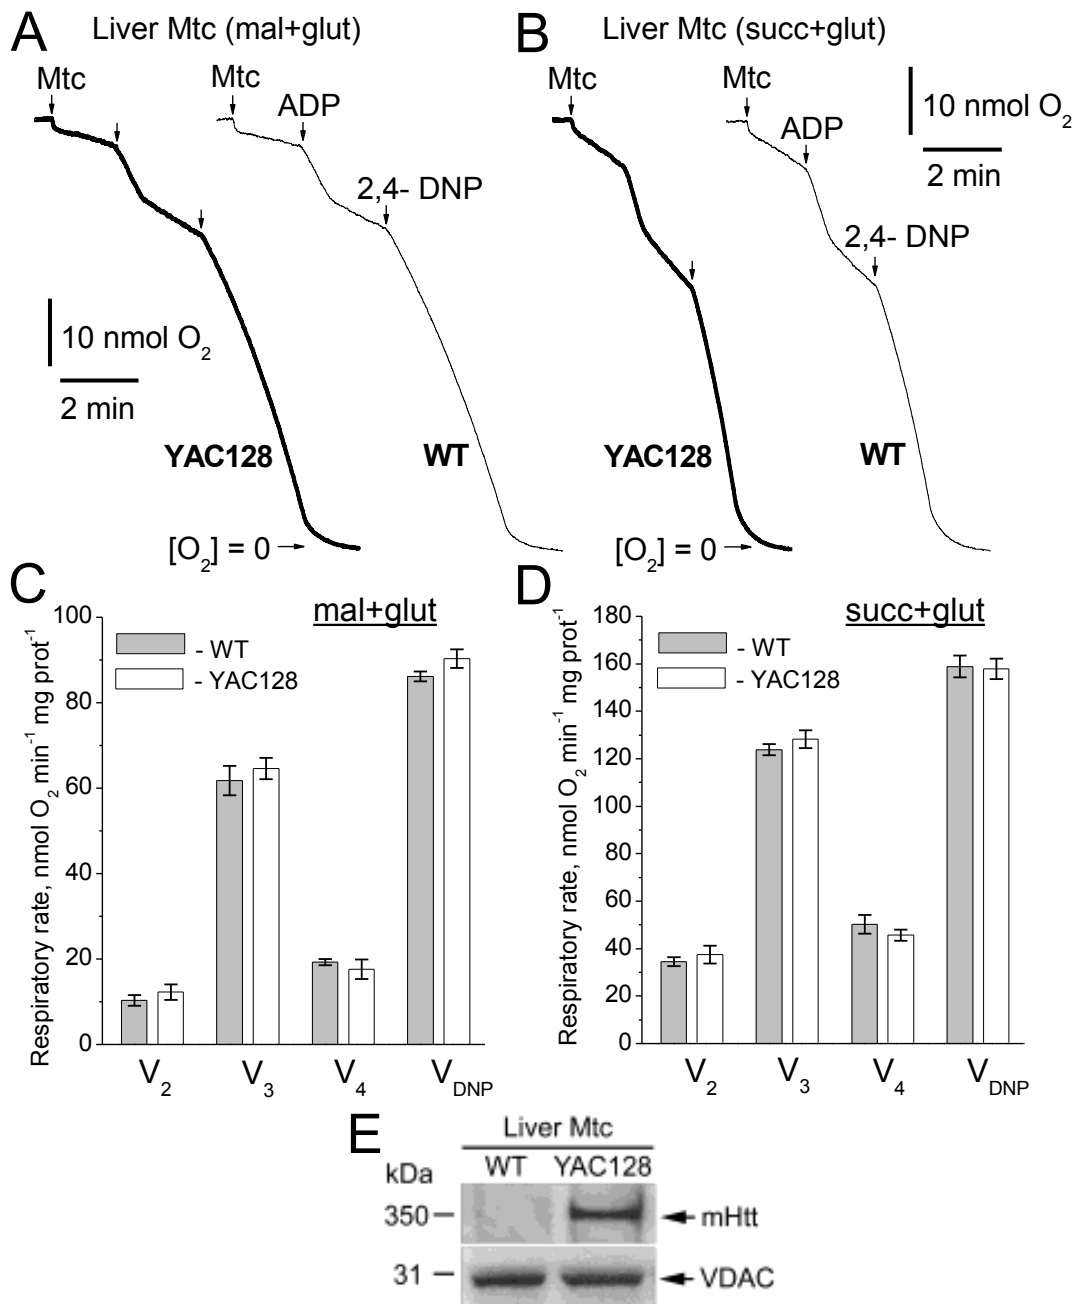

**Suppl. Figure 5. Respiratory activity of liver mitochondria isolated from 2-month old WT (thin traces) and YAC128 (thick traces) mice.** In **A** and **B**, representative traces for mitochondrial O<sub>2</sub> consumption. Where indicated, mitochondria (Mtc), 200μM ADP, and 60μM 2,4-dinitrophenol (2,4-DNP) were added. In **A**, incubation medium was supplemented with 3 mM glutamate (glut) and 1 mM malate (mal). In **B**, incubation medium was with 3 mM succinate (succ) and 3 mM glutamate (glut). In **C** and **D**, statistical analysis of respiratory rates. Data are mean±SEM, N=6. **E**, Western blot, showing the presence of mHtt in liver mitochondria from YAC128 mice. VDAC was used as a loading control.

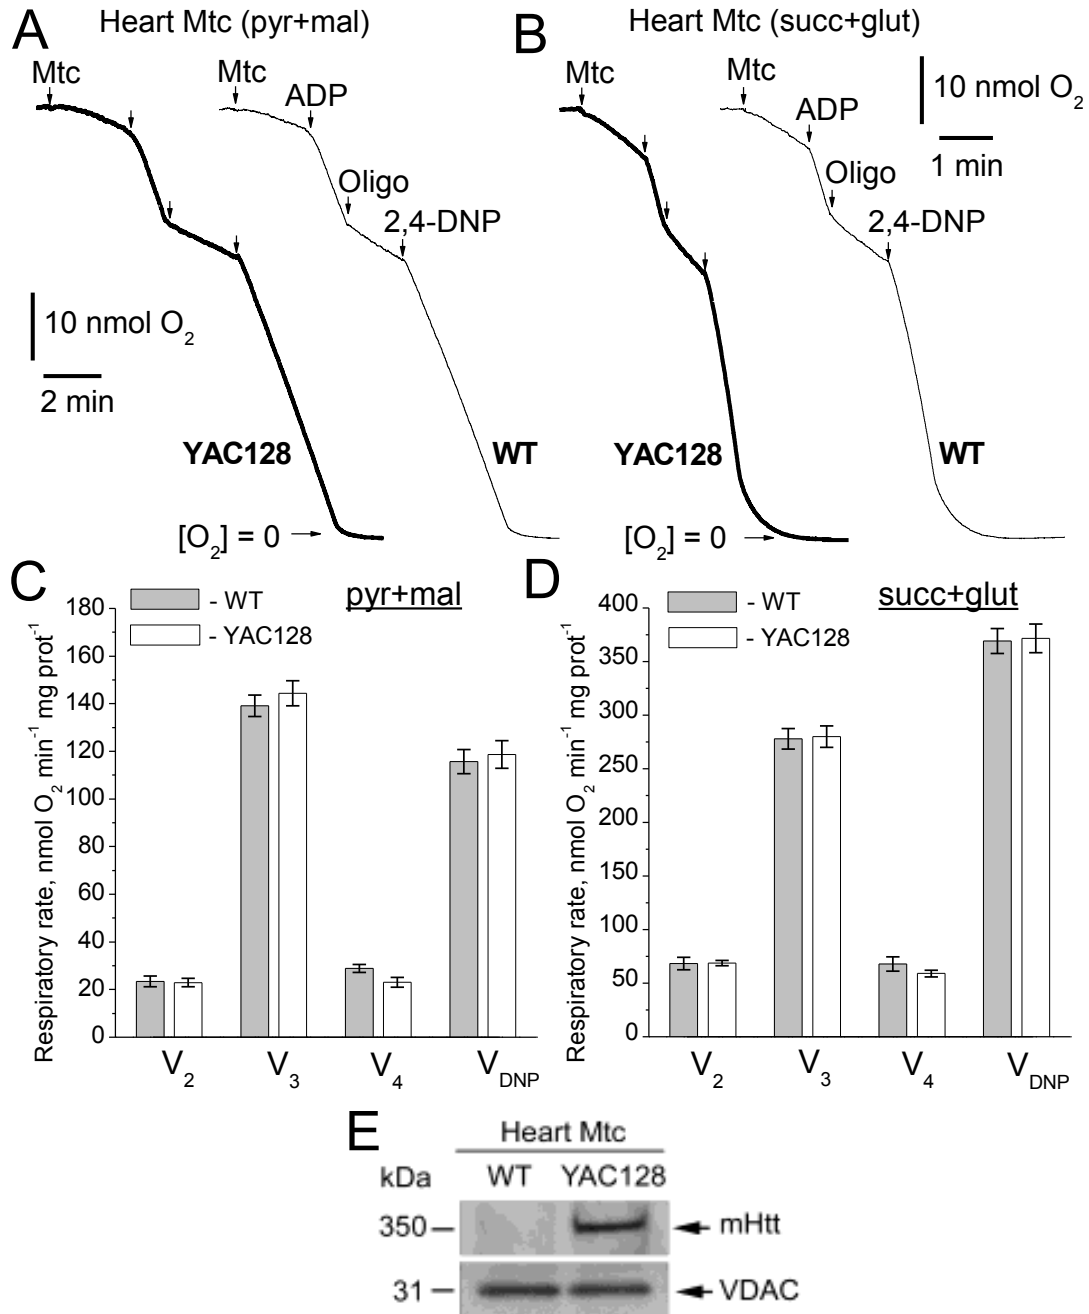

**Suppl. Figure 6. Respiratory activity of heart mitochondria isolated from 2-month old WT (thin traces) and YAC128 (thick traces) mice.** In **A** and **B**, representative traces for mitochondrial O<sub>2</sub> consumption. Where indicated, mitochondria (Mtc), 200μM ADP, 1μM oligomycin (to inhibit ATP synthase) and 60μM 2,4-dinitrophenol (2,4-DNP) were added. In **A**, incubation medium was supplemented with 3 mM pyruvate (pyr) and 1 mM malate (mal). In **B**, incubation medium was with 3 mM succinate (succ) and 3 mM glutamate (glut). In **C** and **D**, statistical analysis of respiratory rates. Data are mean±SEM, N=6. **E**, Western blot, showing the presence of mHtt in heart mitochondria from YAC128 mice. VDAC was used as a loading control.

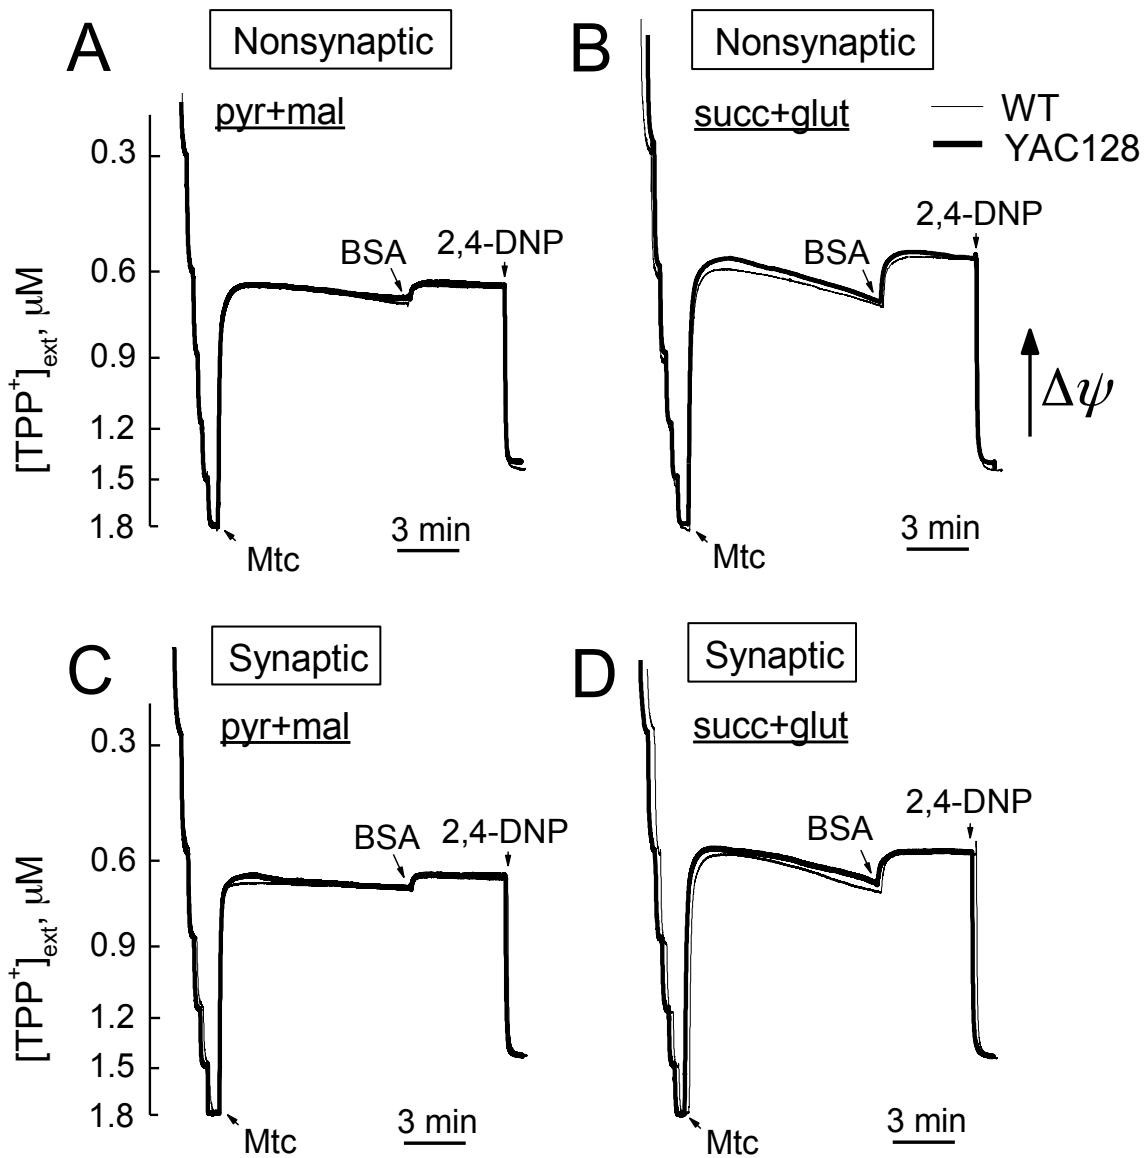

Suppl Fig 7.

**Suppl. Figure 7. The effect of bovine serum albumin (BSA) on mitochondrial membrane potential in nonsynaptic (A, B) and synaptic (C, D) mitochondria isolated from 2-month old WT (thin traces) and YAC128 (thick traces) mice. Representative traces for TPP<sup>+</sup> accumulation indicating changes in mitochondrial membrane potential ( $\Delta\psi$ ) in response to 0.1% BSA (free from fatty acids) and 60 $\mu$ M 2,4-dinitrophenol. In A and C, incubation medium was supplemented with 3 mM pyruvate (pyr) and 1 mM malate (mal). In B and D, incubation medium contained 3 mM succinate (succ) and 3 mM glutamate (glut).**

Supplemental Table 1. Calculation of a sample size using Power Analysis method.

| <b>Respiration</b>                                  |      |      |       |                     |       |       |
|-----------------------------------------------------|------|------|-------|---------------------|-------|-------|
| <b>Nonsynaptic Mtc</b>                              |      |      |       | <b>Synaptic Mtc</b> |       |       |
| Pyruvate + Malate                                   |      |      |       |                     |       |       |
| Effect size                                         | 10%  | 20%  | 30%   | 10%                 | 20%   | 30%   |
| V <sub>3</sub>                                      | 29.7 | 59.4 | 89.1  | 30.8                | 61.6  | 92.4  |
| SD                                                  | 22.6 | 22.6 | 22.6  | 18.6                | 18.6  | 18.6  |
| N=                                                  | 10   | 4    | 3     | 7                   | 3     | 3     |
| V <sub>DNP</sub>                                    | 21.8 | 43.6 | 65.4  | 20.6                | 41.2  | 61.8  |
| SD                                                  | 14.4 | 14.4 | 14.4  | 13.5                | 13.5  | 13.5  |
| N=                                                  | 8    | 4    | 3     | 8                   | 4     | 3     |
| <b>Nonsynaptic Mtc</b>                              |      |      |       | <b>Synaptic Mtc</b> |       |       |
| Succinate + Glutamate                               |      |      |       |                     |       |       |
| Effect size                                         | 10%  | 20%  | 30%   | 10%                 | 20%   | 30%   |
| V <sub>3</sub>                                      | 31.8 | 63.6 | 95.4  | 40.7                | 81.4  | 122.1 |
| SD                                                  | 23.5 | 23.5 | 23.5  | 22.8                | 22.8  | 22.8  |
| N=                                                  | 10   | 4    | 3     | 7                   | 3     | 3     |
| V <sub>DNP</sub>                                    | 49.1 | 98.2 | 147.3 | 70.9                | 141.8 | 212.7 |
| SD                                                  | 25.1 | 25.1 | 25.1  | 43.9                | 43.9  | 43.9  |
| N=                                                  | 6    | 3    | 3     | 8                   | 3     | 3     |
| <b>Membrane potential (<math>\Delta\psi</math>)</b> |      |      |       |                     |       |       |
| <b>Nonsynaptic Mtc</b>                              |      |      |       | <b>Synaptic Mtc</b> |       |       |
| Pyruvate + Malate                                   |      |      |       |                     |       |       |
| Effect size                                         | 10%  | 20%  | 30%   | 10%                 | 20%   | 30%   |
| $\Delta\psi$                                        | 15.2 | 30.4 | 45.6  | 14.6                | 29.2  | 43.8  |
| SD                                                  | 6.8  | 6.8  | 6.8   | 7.9                 | 7.9   | 7.9   |
| N=                                                  | 6    | 3    | 3     | 6                   | 3     | 3     |
| <b>Nonsynaptic Mtc</b>                              |      |      |       | <b>Synaptic Mtc</b> |       |       |
| Succinate + Glutamate                               |      |      |       |                     |       |       |
| Effect size                                         | 10%  | 20%  | 30%   | 10%                 | 20%   | 30%   |
| $\Delta\psi$                                        | 16.6 | 33.2 | 49.8  | 15.7                | 31.4  | 47.1  |
| SD                                                  | 8.0  | 8.0  | 8.0   | 9.2                 | 9.2   | 9.2   |
| N=                                                  | 6    | 3    | 3     | 7                   | 3     | 3     |

Power analysis was performed using G\*Force software version 3.1.9.2 (by Franz Faul, Universitat Kiel, Germany) to establish the sample size necessary to detect a 10 and 20% difference between mitochondria from WT and YAC128 mice. Based on this power analysis,



the number of experiments that gives an 80% likelihood (the accepted level in statistical analysis) of detecting 10% difference between two means at the significance level of  $\alpha=0.05$  is within the range of 6 to 10 experiments. The number of experiments suitable for statistical analysis was assumed to be 3 or higher.  $V_3$ , respiratory rate in the presence of 200 $\mu$ M ADP;  $V_{DNP}$ , respiratory rate in the presence of 60 $\mu$ M 2,4-DNP;  $\Delta\psi$ , mitochondrial membrane potential; SD, standard deviation. Where indicated, the incubation medium was supplemented either with 3 mM pyruvate plus 1 mM malate or with 3 mM succinate plus 3 mM glutamate.
